# Supplementary material
Source: Springer Nature journal article supplement (https://www.springermedizin.de/resource/supplementary/12916_2013_853_MOESM3_ESM.pdf/9598514)

# RESPONSE

## Fluoxetine versus placebo

## Venlafaxine versus placebo

## Venlafaxine versus fluoxetine

Study Reference

MY-1043/BRL-029060/115  
Rudolph  
Nemeroff  
Sheehan  
Silverstone  
Heiligenstein  
Moreno  
Andreoli  
Bjerkenstedt  
Corrigan  
Fava  
Goldstein

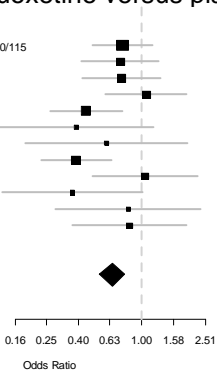

Study Reference

WXL101497  
AK130940  
Cunningham  
Cunningham  
Khan  
Leclubier  
Mendels  
Rudolph  
Thase  
Rudolph  
Nemeroff  
Sheehan  
Silverstone

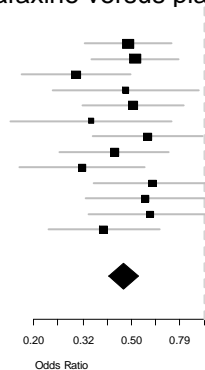

Study Reference

Rudolph  
Nemeroff  
Sheehan  
Silverstone  
Alves  
Clerc  
Costa e Silva  
De Nayer  
Dierick  
Keller  
Tzanakaki  
Tylee

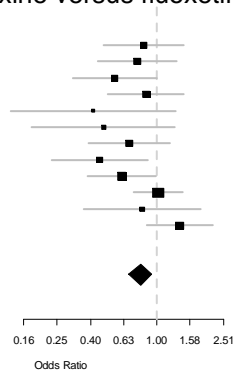

# REMISSION

## Fluoxetine versus placebo

## Venlafaxine versus placebo

## Venlafaxine versus fluoxetine

Study Reference

Rudolph  
Nemeroff  
Sheehan  
Silverstone  
Heiligenstein  
Moreno  
Andreoli  
Bjerkenstedt  
Fava  
Goldstein

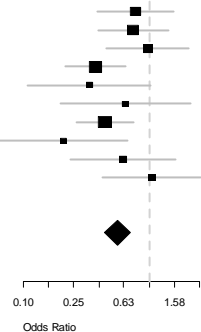

Study Reference

WXL101497  
AK130940  
Guelfi  
Thase  
Rudolph  
Nemeroff  
Sheehan  
Silverstone

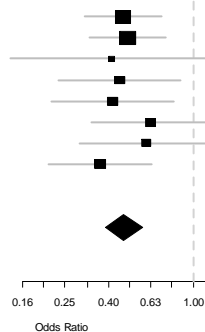

Study Reference

Rudolph  
Nemeroff  
Sheehan  
Silverstone  
Alves  
Costa e Silva  
De Nayer  
Keller  
Tzanakaki  
Tylee

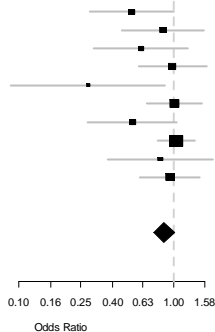

Supplement: MOESM3 [file 9598514]
